# Supplementary material for: Effect of elevation, season and accelerated snowmelt on biogeochemical processes during isolated conifer needle litter decomposition
Source: PeerJ journal article supplement (doi:10.7717/peerj.11926), 2021-08-10

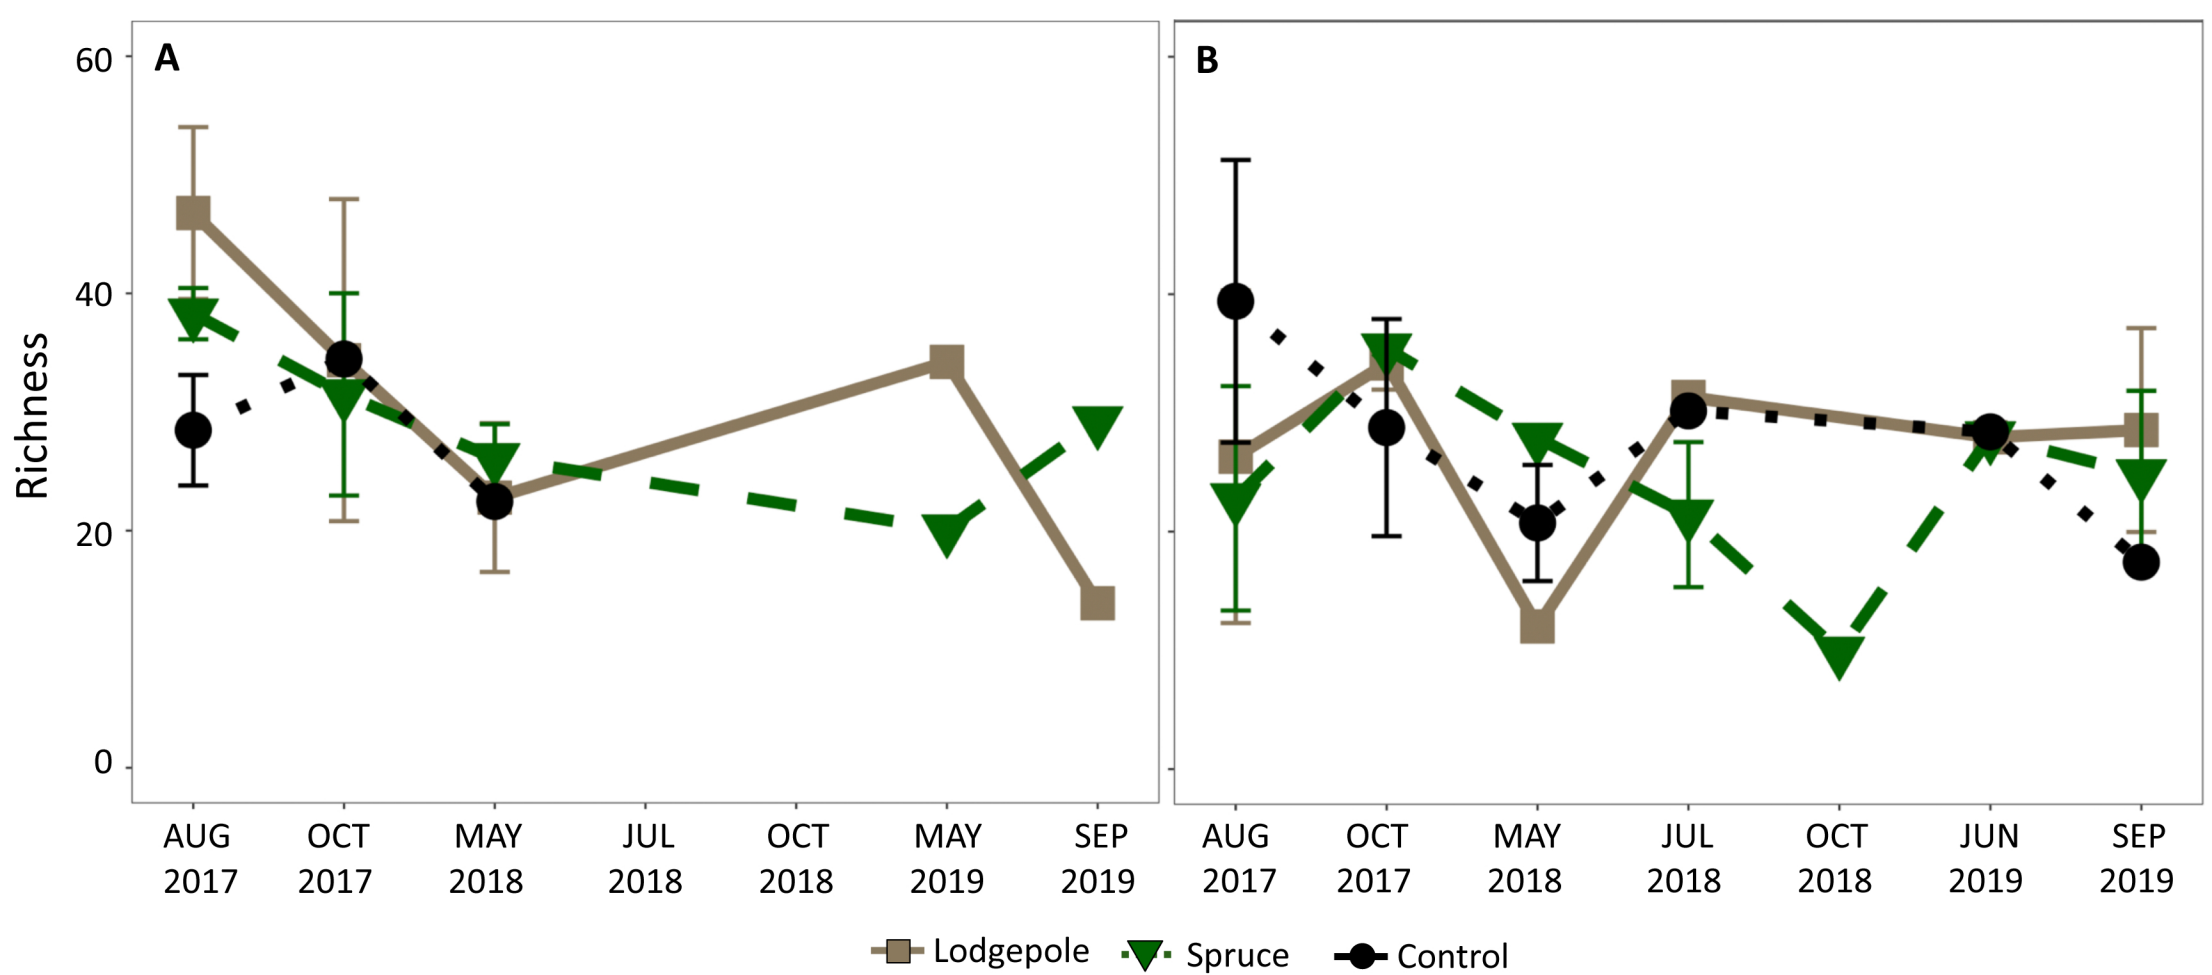

Supplement: Figure_S11.pdf [file Figure_S11.pdf]
