# Supplementary material for: Effect of elevation, season and accelerated snowmelt on biogeochemical processes during isolated conifer needle litter decomposition
Source: PeerJ journal article supplement (doi:10.7717/peerj.11926), 2021-08-10
Supplement: FigureS8.pdf [file FigureS8.pdf]

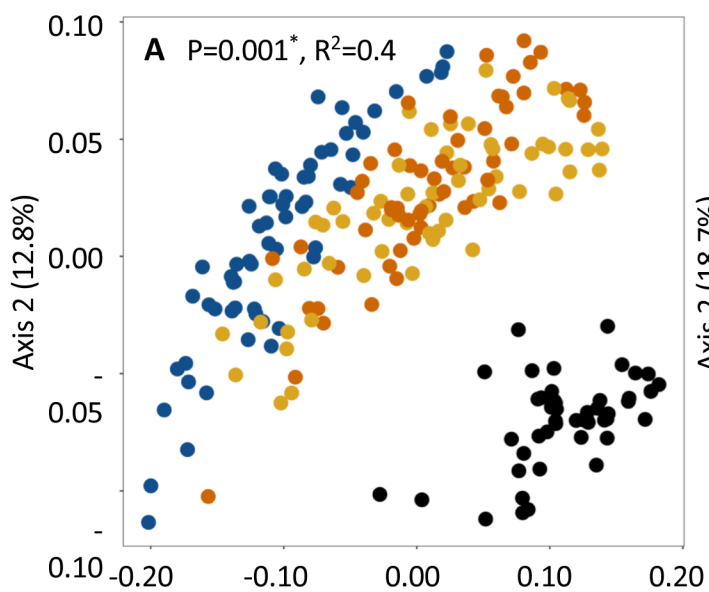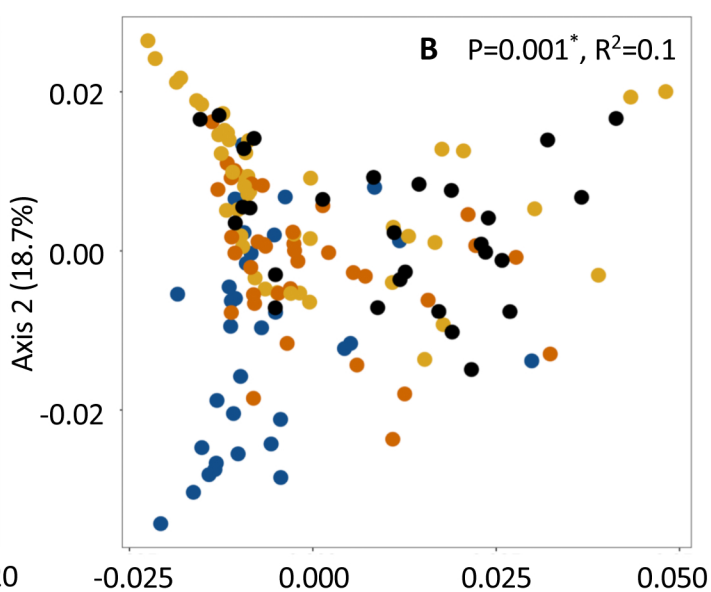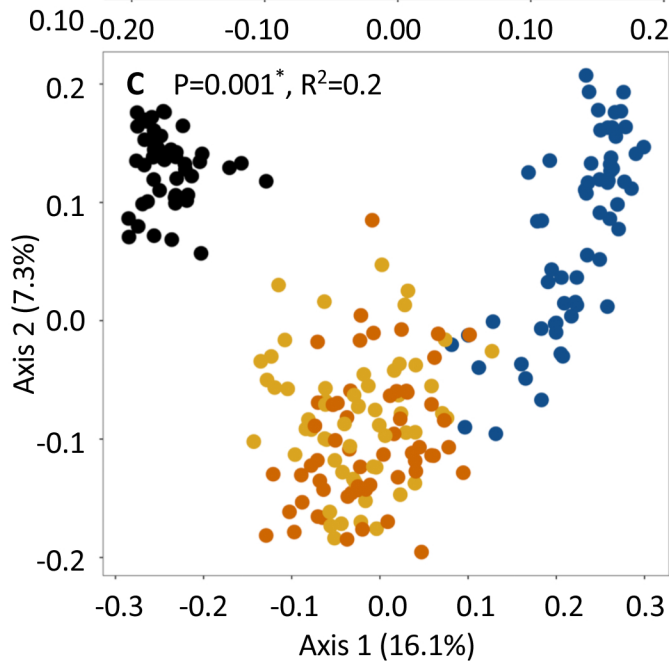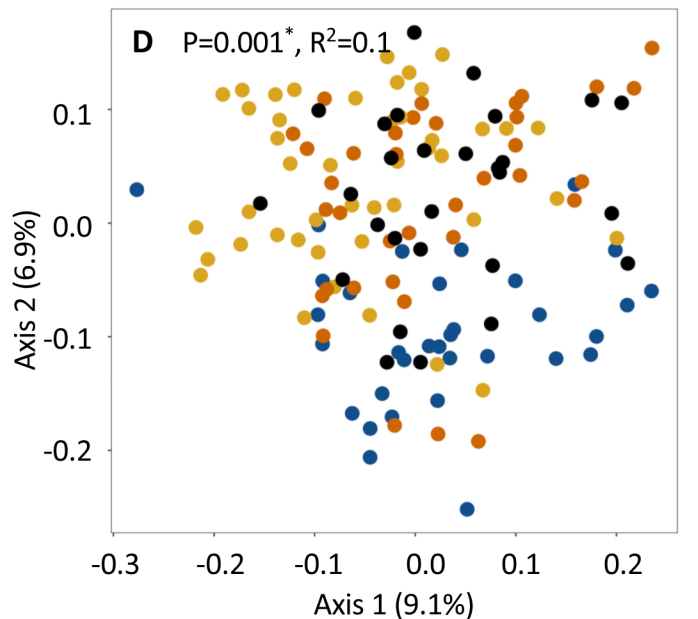

Location

- Lower
- Middle
- Middle-ES
- Upper
