# Supplementary material for: Effect of elevation, season and accelerated snowmelt on biogeochemical processes during isolated conifer needle litter decomposition
Source: PeerJ journal article supplement (doi:10.7717/peerj.11926), 2021-08-10

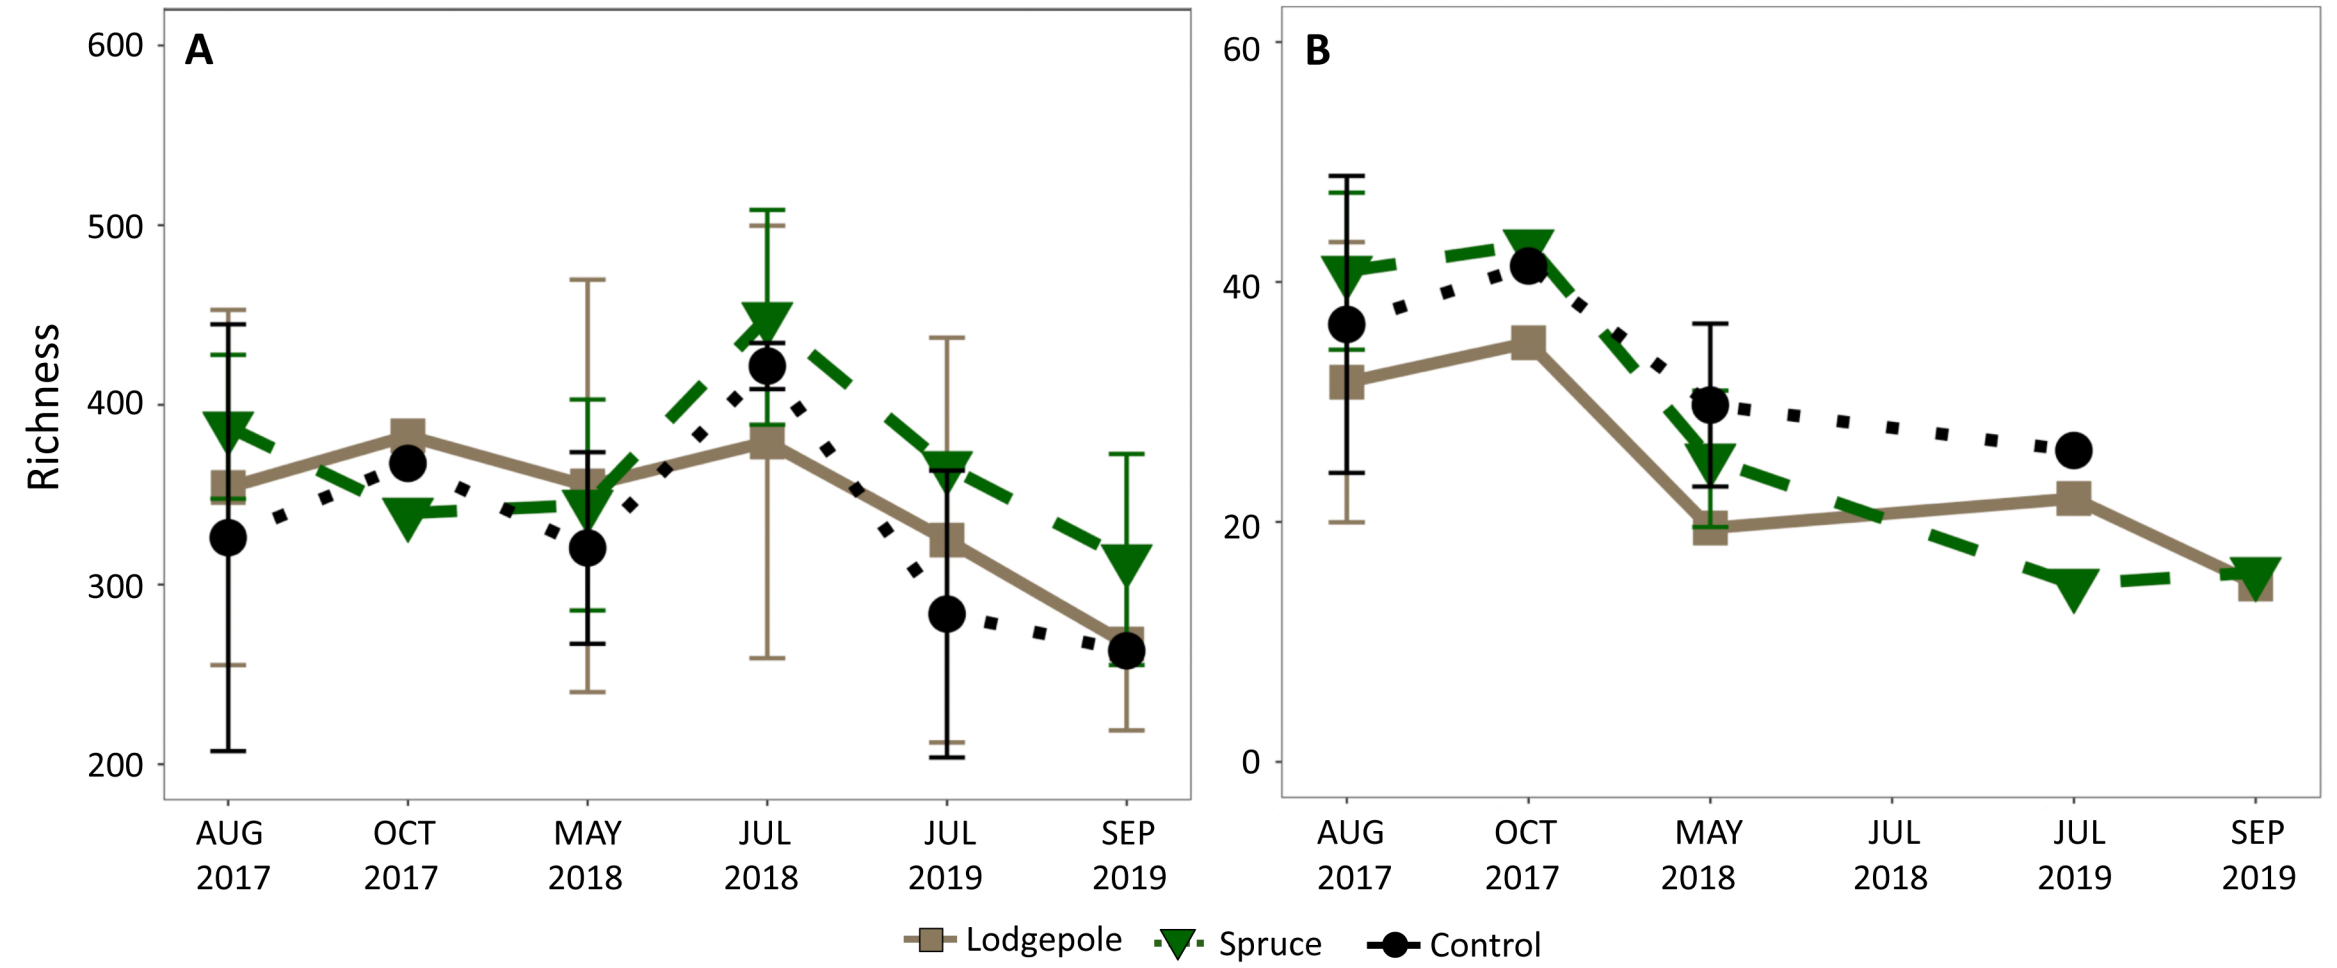

Supplement: FigureS9.pdf [file FigureS9.pdf]
