# Supplementary material for: Effect of elevation, season and accelerated snowmelt on biogeochemical processes during isolated conifer needle litter decomposition
Source: PeerJ journal article supplement (doi:10.7717/peerj.11926), 2021-08-10
Supplement: FigureS12.pdf [file FigureS12.pdf]

## Phylum

### Lower

|                    |      |      |      |      |  |      |      |
|--------------------|------|------|------|------|--|------|------|
| Ascomycota         | 36.9 | 44.9 | 26.9 | 23.5 |  | 50.1 | 67.4 |
| Cercozoa           | 25.8 | 27   | 39.2 | 48.5 |  | 21.5 | 3.7  |
| Basidiomycota      | 13.4 | 6.4  | 15.5 | 15   |  | 10   | 25.3 |
| Incertae_Sedis     | 7    | 5.6  | 6.6  | 4    |  | 3.4  | 2    |
| Phragmoplastophyta | 5.7  | 2.8  | 1.6  | 0    |  | 9.9  | 0    |
| Apicomplexa        | 0.2  | 7.1  | 0.3  | 0    |  | 0    | 0    |
| Chytridiomycota    | 2.2  | 2.2  | 1.4  | 4.5  |  | 0.3  | 0.3  |
| Annelida           | 0    | 0.4  | 4.5  | 0    |  | 4.3  | 0    |
| Peronosporomycetes | 4.1  | 0.2  | 0.4  | 1    |  | 0    | 0    |
| Ciliophora         | 1.1  | 1    | 0.1  | 3.5  |  | 0.2  | 0.5  |
| Ochrophyta         | 0.3  | 0.6  | 0.9  | 0    |  | 0.3  | 0.5  |
| Arthropoda         | 0.7  | 0.2  | 0.9  | 0    |  | 0    | 0.3  |
| Tardigrada         | 0.4  | 0.4  | 0.8  | 0    |  | 0    | 0    |
| Chlorophyta_ph     | 0.7  | 0.5  | 0    | 0    |  | 0    | 0    |
| Microsporidia      | 0.1  | 0.2  | 0.8  | 0    |  | 0    | 0    |

AUG 2017   OCT 2017   MAY 2018   JUL 2018   OCT 2018   MAY 2019   SEP 2019

### Middle

|                     |      |      |      |      |      |      |      |
|---------------------|------|------|------|------|------|------|------|
| Ascomycota          | 43.8 | 47.4 | 31.8 | 59   | 16.5 | 56.1 | 52   |
| Basidiomycota       | 10.2 | 15.8 | 32.3 | 24.2 | 6.5  | 8.7  | 42.2 |
| Cercozoa            | 14.4 | 13.5 | 15.4 | 6.8  | 0    | 13.8 | 3.1  |
| Phragmoplastophyta  | 15.2 | 5    | 11.7 | 0    | 74   | 8.4  | 0    |
| Incertae_Sedis      | 3.8  | 4.8  | 3.1  | 4.1  | 2    | 3.8  | 0.4  |
| Chlorophyta_ph      | 1.6  | 4.4  | 1.8  | 0    | 0    | 3.3  | 0    |
| Arthropoda          | 4.5  | 2.5  | 0.8  | 0.7  | 0    | 0.2  | 0.1  |
| Nematoda            | 2.1  | 1.6  | 0.1  | 1.2  | 1    | 0.1  | 0.3  |
| Chytridiomycota     | 0.9  | 0.4  | 0.2  | 1.2  | 0    | 3.5  | 0.1  |
| Ciliophora          | 1.4  | 0.6  | 0.1  | 0.5  | 0    | 0.6  | 0.5  |
| Tardigrada          | 0.6  | 1.1  | 0.4  | 0.5  | 0    | 0.3  | 0.9  |
| Klebsormidiophyceae | 0.7  | 0    | 2.2  | 0.2  | 0    | 0.3  | 0    |
| Ochrophyta          | 0.3  | 1.4  | 0.2  | 0.6  | 0    | 0.1  | 0.1  |
| Schizoplasmodiida   | 0    | 0.3  | 0    | 1.1  | 0    | 0.2  | 0.1  |
| Hypochytriomycetes  | 0.1  | 0.2  | 0    | 0    | 0    | 0.4  | 0    |

AUG 2017   OCT 2017   MAY 2018   JUL 2018   OCT 2018   JUN 2019   SEP 2019

### Upper

|                     |      |      |      |  |  |      |      |
|---------------------|------|------|------|--|--|------|------|
| Ascomycota          | 29.5 | 48.2 | 31.9 |  |  | 43.3 | 33   |
| Phragmoplastophyta  | 18.3 | 3.5  | 6.7  |  |  | 19.8 | 22.4 |
| Cercozoa            | 14.2 | 6.4  | 20.7 |  |  | 7.9  | 15.4 |
| Basidiomycota       | 11.3 | 30.6 | 12.8 |  |  | 6.3  | 3.8  |
| Chlorophyta_ph      | 5.6  | 0.8  | 11.1 |  |  | 5.4  | 0    |
| Incertae_Sedis      | 5.1  | 2.4  | 6.8  |  |  | 9.5  | 5.9  |
| Arthropoda          | 2.5  | 4.8  | 0.6  |  |  | 2.4  | 9.3  |
| Cryptomycota        | 3.3  | 0.3  | 1.4  |  |  | 1.8  | 0    |
| Ciliophora          | 2.6  | 0.3  | 2    |  |  | 0.4  | 0    |
| Chytridiomycota     | 1.1  | 0.8  | 2.3  |  |  | 0.9  | 0    |
| Nematoda            | 0.9  | 0.5  | 1.1  |  |  | 0    | 7.7  |
| Annelida            | 1.8  | 0    | 0.2  |  |  | 0    | 0    |
| Tardigrada          | 0.3  | 0    | 0.1  |  |  | 2.2  | 2    |
| Schizoplasmodiida   | 1.1  | 0.3  | 0    |  |  | 0    | 0    |
| Klebsormidiophyceae | 0.2  | 0.5  | 1.4  |  |  | 0    | 0    |

AUG 2017   OCT 2017   MAY 2018   JUL 2018   OCT 2018   JUL 2019   SEP 2019
