# Supplementary material for: Effect of elevation, season and accelerated snowmelt on biogeochemical processes during isolated conifer needle litter decomposition
Source: PeerJ. 2021 Aug 10;9:e11926. doi: 10.7717/peerj.11926 (PMC8362670; doi:10.7717/peerj.11926)
Supplement: Supplemental Information 20 [file peerj-09-11926-s020.csv]

Date	Location	Sample	N2O_dry_flux	N2O_mg/day	CH4_dry_flux	CH4_mg/day	CO2_dry_flux	CO2_mg/day	NH3_flux	Microclimate_Temperature	Microclimate_Moisture
6/1/17	Lower	Control	4.85128E-10	1.173620667	-3.61002E-10	-0.374630014	2.22352E-06	2307.463668	-9.85187E-12	14.9775	0.2033
6/1/17	Lower	Control	4.5931E-10	1.111162278	-4.58016E-10	-0.475306068	2.76776E-06	2872.248368	-4.07586E-10	14.558	0.2033
6/1/17	Lower	Control	-4.79756E-10	-1.160626221	-2.88688E-10	-0.299585811	2.79724E-06	2902.833204	3.59833E-11	-	-
6/1/17	Lower	Control	4.1603E-11	0.100646078	-4.85974E-10	-0.504319442	3.44936E-06	3579.572382	-2.85035E-11	14.9775	0.2033
6/1/17	Lower	Control	1.17371E-10	0.28394445	-4.79266E-10	-0.497358159	3.69088E-06	3830.208213	1.47724E-10	-	-
6/1/17	Lower	Control	-7.34192E-11	-0.177615798	-6.64419E-10	-0.68950104	4.47705E-06	4646.056719	1.25313E-12	13.2765	0.20475
6/14/17	Lower	Control	-2.79557E-11	-0.067630512	-6.47402E-10	-0.671841878	2.26727E-06	2352.857091	-8.81289E-13	13.8355	0.1615
6/14/17	Lower	Control	1.86424E-11	0.045099779	-7.17506E-10	-0.744591939	2.80388E-06	2909.728286	9.55145E-12	13.8355	0.1615
6/14/17	Lower	Control	-2.18712E-10	-0.529107088	-7.32554E-10	-0.760207934	2.81278E-06	2918.961022	-2.54776E-13	15.7195	0.1608
6/14/17	Lower	Control	-3.94317E-11	-0.095393285	-7.45753E-10	-0.773905461	2.95985E-06	3071.583092	2.81855E-11	15.7195	0.1608
6/14/17	Lower	Control	-1.15341E-11	-0.027903382	-8.55626E-10	-0.887926209	3.07774E-06	3193.926699	6.64576E-12	12.84	0.16045
8/3/17	Lower	Control	-1.26716E-11	-0.030655101	-1.0517E-09	-1.091401329	2.95203E-06	3063.474878	-2.75044E-11	17.316	0.14845
8/3/17	Lower	Control	5.52936E-11	0.13376639	-1.06909E-09	-1.109443948	3.07494E-06	3191.017339	-1.65654E-11	17.329	0.14775
8/3/17	Lower	Control	-2.17995E-09	-5.273735153	-1.20081E-09	-1.246145109	3.85078E-06	3996.143683	-8.13132E-12	17.316	0.14845
8/27/17	Lower	Control	-4.66E-11	-0.113	-7.29E-10	-0.757	0.00000107	1109.138422	9.73E-12	14.8905	0.1085
8/27/17	Lower	Control	-9.26E-11	-0.224	-6.34E-10	-0.658	0.00000109	1132.149075	1.45E-11	16.2615	0.10705
8/27/17	Lower	Control	-7.2E-11	-0.174	-8.34E-10	-0.865	0.00000123	1278.986346	1.77E-11	14.8905	0.1085
9/14/17	Lower	Control	-7.68314E-10	-1.858705825	-4.77226E-10	-0.495241719	4.36331E-07	452.8024853	5.01473E-11	8.9995	0.0958
9/14/17	Lower	Control	-6.95949E-10	-1.683640865	-6.79696E-10	-0.705355118	5.94733E-07	617.1843451	1.61692E-11	8.9995	0.0958
9/14/17	Lower	Control	6.49759E-11	0.157189635	-6.97987E-10	-0.724336746	6.13552E-07	636.7137836	2.62902E-11	9.743	0.0958
9/14/17	Lower	Control	-6.14828E-12	-0.01487391	-1.00061E-09	-1.038382332	8.50255E-07	882.352325	6.67971E-11	8.558	0.09475
6/20/18	Lower	Control	-2.0269E-11	-0.049034664	-5.40078E-10	-0.560466663	2.73019E-06	2833.256338	1.85701E-11	12.432	0.1267
6/20/18	Lower	Control	-1.56003E-11	-0.037740223	-7.12463E-10	-0.739358513	2.7332E-06	2836.379636	5.2408E-12	13.9895	0.1263
6/20/18	Lower	Control	2.67284E-10	0.646612805	-8.04602E-10	-0.834975569	3.1372E-06	3255.635164	9.17159E-12	13.9895	0.1263
7/26/18	Lower	Control	8.05872E-12	0.019495643	-6.01182E-10	-0.623876775	7.92104E-07	822.0066555	1.53002E-11	14.049	0.08305
7/26/18	Lower	Control	-5.30871E-11	-0.128428374	-6.75187E-10	-0.700675417	1.04594E-06	1085.423073	3.08244E-11	14.049	0.08305
7/26/18	Lower	Control	-2.24408E-10	-0.542887501	-6.61966E-10	-0.686955516	1.45972E-06	1514.820897	4.91755E-11	14.049	0.08305
8/14/18	Lower	Control	3.80977E-09	9.216605055	-6.06817E-10	-0.629725	7.29768E-07	757.3165629	-3.87593E-12	12.617	0.0867
8/14/18	Lower	Control	-1.40003E-08	-33.86954471	-6.97163E-10	-0.723481543	7.55279E-07	783.7911529	2.36114E-12	12.617	0.0867
8/14/18	Lower	Control	1.54874E-10	0.374671706	-7.99008E-10	-0.829170378	1.04493E-06	1084.380437	1.64575E-11	12.617	0.0867
9/14/18	Lower	Control	8.64479E-11	0.209134774	-6.26817E-10	-0.650479099	5.69301E-07	590.7925647	-3.01434E-12	11.639	0.1078
9/14/18	Lower	Control	-3.67043E-10	-0.887950889	-7.41444E-10	-0.769433401	8.38285E-07	869.9302793	6.38805E-12	11.639	0.1078
9/14/18	Lower	Control	-9.55619E-11	-0.231183436	-8.97089E-10	-0.930954206	9.36991E-07	972.3622725	6.23993E-10	8.419	0.10815
6/1/17	Lower	Lodgepole	-1.12807E-09	-2.729015034	-1.58548E-10	-0.164533459	1.88648E-06	1957.69419	5.66426E-12	-	-
6/1/17	Lower	Lodgepole	4.3532E-11	0.10531268	-2.22503E-10	-0.230902087	1.98908E-06	2064.167995	9.68063E-12	-	-
6/1/17	Lower	Lodgepole	2.77908E-11	0.067231622	-1.8587E-10	-0.192886416	2.24433E-06	2329.05781	-3.44163E-12	14.558	0.2033
6/1/17	Lower	Lodgepole	6.62899E-11	0.160368514	-2.12314E-10	-0.220329323	2.91158E-06	3021.491913	3.84136E-12	14.558	0.2033
6/1/17	Lower	Lodgepole	-5.74841E-11	-0.13906564	-1.18066E-10	-0.122523124	2.96338E-06	3075.251721	2.99805E-12	14.558	0.2033
6/1/17	Lower	Lodgepole	-1.36818E-11	-0.033098928	-1.3516E-10	-0.140262137	3.17776E-06	3297.721113	1.1732E-11	-	-
6/1/17	Lower	Lodgepole	-1.79614E-10	-0.434521913	-2.44473E-10	-0.253701802	3.25955E-06	3382.5958	1.68745E-11	14.558	0.2033
6/14/17	Lower	Lodgepole	-7.65978E-12	-0.018530547	-3.87504E-10	-0.402131963	1.54289E-06	1601.137476	5.99444E-12	12.84	0.16045
6/14/17	Lower	Lodgepole	1.68655E-11	0.040801033	-3.61107E-10	-0.374738523	1.57366E-06	1633.067678	-3.80877E-13	12.84	0.16045
6/14/17	Lower	Lodgepole	3.9003E-11	0.09435612	-1.41978E-10	-0.147337938	1.74119E-06	1806.91965	1.32856E-11	15.7195	0.1608
6/14/17	Lower	Lodgepole	-3.44046E-11	-0.083231704	-3.10762E-10	-0.322493271	2.43694E-06	2528.940205	1.72493E-11	15.7195	0.1608
6/14/17	Lower	Lodgepole	4.11203E-10	0.994781582	-3.9871E-10	-0.413761412	2.73778E-06	2841.133401	-3.13862E-13	15.7195	0.1608
8/3/17	Lower	Lodgepole	6.80803E-09	16.46999806	-8.13977E-10	-0.844704638	4.11317E-06	4268.447588	-3.16033E-11	17.316	0.14845
8/3/17	Lower	Lodgepole	-1.11885E-09	-2.706715053	-8.82829E-10	-0.916156653	6.52705E-06	6773.444886	-5.33888E-12	17.329	0.14775
8/3/17	Lower	Lodgepole	-6.72665E-11	-0.162731114	-7.55151E-10	-0.78365824	8.65273E-06	8979.371173	-1.26771E-10	17.316	0.14845
8/27/17	Lower	Lodgepole	4.81E-11	0.116	-4.75E-10	-0.493	0.000000651	675.740264	-1.49E-12	14.8905	0.1085
8/27/17	Lower	Lodgepole	-3.45E-11	-0.0835	-4.12E-10	-0.428	0.00000118	1227.194613	9.56E-12	16.2615	0.10705
8/27/17	Lower	Lodgepole	5.56E-11	0.135	-5.28E-10	-0.548	0.00000133	1377.159271	3.44E-11	14.8905	0.1085
9/14/17	Lower	Lodgepole	-2.12668E-11	-0.051448614	-5.92398E-10	-0.61476143	4.55634E-07	472.8347801	1.33313E-11	8.558	0.09475
9/14/17	Lower	Lodgepole	-6.44055E-10	-1.558098296	-4.3997E-10	-0.456578848	5.84424E-07	606.4863415	4.6971E-11	9.743	0.0958
9/14/17	Lower	Lodgepole	1.12866E-10	0.273044874	-6.49531E-10	-0.674050908	7.30562E-07	758.1407825	2.03064E-11	8.9995	0.0958
9/14/17	Lower	Lodgepole	-1.80776E-07	-437.3322851	-7.16034E-10	-0.743064988	1.00864E-06	1046.711547	2.32021E-11	8.9995	0.0958
6/20/18	Lower	Lodgepole	-2.99175E-11	-0.072376348	-6.72936E-10	-0.698339399	2.04241E-06	2119.51183	4.17614E-11	12.432	0.1267
6/20/18	Lower	Lodgepole	-2.4843E-09	-6.010021954	-6.34265E-10	-0.658209112	3.76712E-06	3909.332472	5.20005E-11	13.9895	0.1263
6/20/18	Lower	Lodgepole	-4.05795E-10	-0.981699655	-4.87014E-10	-0.505398941	4.02674E-06	4178.751715	4.18984E-11	13.9895	0.1263
7/26/18	Lower	Lodgepole	6.57574E-11	0.15908035	-6.65016E-10	-0.690120373	9.55512E-07	991.582834	5.9576E-11	14.049	0.08305
7/26/18	Lower	Lodgepole	-1.4205E-10	-0.343647946	-3.94519E-10	-0.409412409	1.0178E-06	1056.219911	4.71346E-11	14.049	0.08305
7/26/18	Lower	Lodgepole	2.34419E-10	0.567107108	-5.47211E-10	-0.567868197	1.30084E-06	1349.942527	5.23375E-11	14.049	0.08305
8/14/18	Lower	Lodgepole	-4.8773E-10	-1.179915416	-7.45374E-10	-0.773512343	5.81966E-07	603.9349729	1.03273E-11	12.617	0.0867
8/14/18	Lower	Lodgepole	-3.95183E-09	-9.560256342	-5.99024E-10	-0.621636896	7.41109E-07	769.0857162	8.99948E-12	12.617	0.0867
8/14/18	Lower	Lodgepole	2.13623E-10	0.516796056	-6.52325E-10	-0.676950983	1.23137E-06	1277.859559	1.93763E-11	12.617	0.0867
9/14/18	Lower	Lodgepole	-5.97867E-11	-0.14463597	-6.02464E-10	-0.625207061	7.31565E-07	759.182004	3.75228E-10	11.639	0.1078
9/14/18	Lower	Lodgepole	6.17257E-11	0.149326697	-5.60187E-10	-0.5813342	8.31592E-07	862.9844865	6.97325E-12	8.419	0.10815
9/14/18	Lower	Lodgepole	7.06193E-12	0.017084228	-8.37858E-10	-0.869487224	8.57748E-07	890.1278377	1.35078E-11	11.639	0.1078
6/1/17	Lower	Spruce	-3.02723E-11	-0.073234854	-2.93202E-10	-0.304270828	1.90015E-06	1971.879195	3.28899E-11	-	-
6/1/17	Lower	Spruce	-3.71946E-10	-0.899812141	-3.91456E-10	-0.406233929	2.25796E-06	2343.198139	3.59134E-11	-	-
6/1/17	Lower	Spruce	-3.19224E-11	-0.077226637	-3.06101E-10	-0.317656724	2.69904E-06	2800.930487	-3.66883E-15	13.7305	0.20365
6/1/17	Lower	Spruce	-2.04132E-11	-0.049383658	-1.96952E-10	-0.204387468	3.34563E-06	3471.933699	2.16101E-11	-	-
6/1/17	Lower	Spruce	8.77284E-11	0.21223259	-3.76973E-10	-0.391204197	3.41849E-06	3547.536633	-3.23218E-11	14.9775	0.2033
6/1/17	Lower	Spruce	-2.81796E-09	-6.81719933	-3.28971E-10	-0.341389653	3.41999E-06	3549.098158	2.32606E-11	13.2765	0.20475
6/1/17	Lower	Spruce	-4.8459E-11	-0.117232046	-2.64634E-10	-0.274624337	4.27291E-06	4434.217198	-1.31067E-10	-	-
6/14/17	Lower	Spruce	6.14575E-12	0.014867789	-5.50636E-10	-0.57142223	2.03618E-06	2113.046508	5.26114E-12	12.84	0.16045
6/14/17	Lower	Spruce	-2.72097E-11	-0.065825777	-4.83635E-10	-0.501892825	2.03766E-06	2114.587184	8.00954E-12	12.84	0.16045
6/14/17	Lower	Spruce	2.56103E-12	0.006195654	-5.4224E-10	-0.56270926	2.2686E-06	2354.240784	-8.29751E-12	13.8355	0.1615
6/14/17	Lower	Spruce	3.18003E-11	0.076931172	-4.63632E-10	-0.481134385	2.5854E-06	2682.998913	-2.22232E-12	13.8355	0.1615
6/14/17	Lower	Spruce	-8.1789E-11	-0.197863905	-4.81699E-10	-0.499883845	2.93487E-06	3045.663082	-5.09835E-12	15.7195	0.1608
8/3/17	Lower	Spruce	-1.76928E-10	-0.428023597	-1.10024E-09	-1.141772002	3.58271E-06	3717.95918	-3.89816E-11	17.316	0.14845
8/3/17	Lower	Spruce	-1.10615E-09	-2.676007467	-1.0534E-09	-1.093161627	4.91317E-06	5098.640327	-1.57368E-12	17.316	0.14845
8/3/17	Lower	Spruce	-1.38972E-11	-0.033620117	-1.05224E-09	-1.091957375	6.02346E-06	6250.849113	-4.40854E-12	17.329	0.14775
8/27/17	Lower	Spruce	-1.21E-10	-0.293	-6.54E-10	-0.678	0.000001	1039.449719	2.32E-11	14.8905	0.1085
8/27/17	Lower	Spruce	9.54E-12	0.0231	-8.65E-10	-0.898	0.00000127	1316.864986	9.91E-12	14.8905	0.1085
8/27/17	Lower	Spruce	-3.14E-11	-0.0759	-6.75E-10	-0.701	0.00000145	1500.672466	1.41E-11	16.2615	0.10705
9/14/17	Lower	Spruce	-8.52538E-10	-2.06245931	-5.6439E-10	-0.585696436	4.88891E-07	507.3470852	2.48278E-11	8.558	0.09475
9/14/17	Lower	Spruce	3.11221E-11	0.075290464	-7.63691E-10	-0.792520215	5.93682E-07	616.093362	4.87671E-11	8.9995	0.0958
9/14/17	Lower	Spruce	1.44149E-11	0.034872504	-6.48966E-10	-0.673464741	7.62422E-07	791.2035643	3.13646E-11	8.9995	0.0958
9/14/17	Lower	Spruce	-1.09022E-11	-0.026374669	-7.62488E-10	-0.791272713	9.27206E-07	962.2085408	4.92778E-11	9.743	0.0958
6/20/18	Lower	Spruce	-1.57228E-10	-0.380365951	-6.46067E-10	-0.67045673	2.96903E-06	3081.109982	4.45767E-11	12.432	0.1267
6/20/18	Lower	Spruce	7.98246E-12	0.019311175	-8.10759E-10	-0.841365156	2.9929E-06	3105.888119	4.56102E-11	12.432	0.1267
6/20/18	Lower	Spruce	-2.87452E-08	-69.54040336	-5.83351E-10	-0.605372384	5.11268E-06	5305.681156	7.71772E-11	12.432	0.1267
7/26/18	Lower	Spruce	-2.87983E-10	-0.696689665	-7.97337E-10	-0.8274364	1.26416E-06	1311.887719	4.61917E-11	12.931	0.0849
7/26/18	Lower	Spruce	5.07805E-11	0.122848112	-8.95343E-10	-0.929142721	1.30727E-06	1356.616186	2.09193E-11	14.049	0.08305
7/26/18	Lower	Spruce	-2.44766E-10	-0.592137261	-1.3489E-09	-1.399820423	1.58272E-06	1642.467296	5.14831E-11	14.049	0.08305
8/14/18	Lower	Spruce	-1.4773E-10	-0.357389217	-7.90535E-10	-0.820378522	7.65109E-07	793.9921748	9.12065E-12	12.617	0.0867
8/14/18	Lower	Spruce	1.32634E-10	0.320867248	-7.13389E-10	-0.740319729	8.58691E-07	891.1067588	1.01556E-10	12.617	0.0867
8/14/18	Lower	Spruce	9.90029E-11	0.239507711	-1.45448E-09	-1.509386769	1.38949E-06	1441.939151	1.53267E-11	13.905	0.086
9/14/18	Lower	Spruce	7.15192E-10	1.73019288	-7.84934E-10	-0.81456575	6.5664E-07	681.4281048	2.2714E-09	8.419	0.10815
9/14/18	Lower	Spruce	-1.90251E-10	-0.460256315	-7.85932E-10	-0.815601487	7.06219E-07	732.8792126	-3.07312E-12	8.419	0.10815
9/14/18	Lower	Spruce	7.35905E-11	0.178030168	-9.90502E-10	-1.027893649	1.06818E-06	1108.508967	1.46002E-11	11.639	0.1078
6/27/17	Middle	Control	-9.5052E-11	-0.229949861	-1.16853E-09	-1.212645762	1.90718E-06	1979.174169	7.46781E-11	24.123	0.1056
6/27/17	Middle	Control	-4.41767E-11	-0.106872327	-1.14711E-09	-1.190411034	2.48425E-06	2578.0357	1.26563E-11	23.4865	0.10635
6/27/17	Middle	Control	-7.66143E-12	-0.018534525	-1.44846E-09	-1.503143762	2.77859E-06	2883.487621	5.5989E-11	22.5885	0.10525
6/27/17	Middle	Control	-9.15822E-11	-0.221555634	-1.16432E-09	-1.208278023	2.85952E-06	2967.467909	1.4994E-11	22.5885	0.10525
8/3/17	Middle	Control	-2.40971E-11	-0.058295706	-1.23295E-09	-1.279489414	2.65227E-06	2752.39704	-1.60998E-12	11.236	0.18625
8/3/17	Middle	Control	4.3437E-11	0.105082807	-9.7714E-10	-1.014027941	2.942E-06	3053.064882	-1.33683E-12	11.236	0.18625
8/3/17	Middle	Control	2.14127E-11	0.051801677	-1.04848E-09	-1.088062187	3.64739E-06	3785.082029	6.98231E-12	11.236	0.18625
8/21/17	Middle	Control	-6.81E-11	-0.165	-7.16E-10	-0.743	0.00000108	1120.770432	2.19E-11	2.2994	0.2149
8/21/17	Middle	Control	-7.58E-11	-0.183	-8.59E-10	-0.892	0.0000011	1138.947322	-1.18E-11	12.316	0.11435
8/21/17	Middle	Control	-5.44E-11	-0.132	-8.14E-10	-0.845	0.00000115	1190.088418	nan	11.8435	0.1147
8/21/17	Middle	Control	1.41E-10	0.342	-2.25E-09	-2.33	0.00000278	2881.243819	4.94E-11	11.479	0.1147
9/14/17	Middle	Control	-7.20529E-10	-1.74310487	-8.34221E-10	-0.865713075	1.06337E-06	1103.508552	9.31801E-11	14.53666667	0.13975
9/14/17	Middle	Control	-1.71298E-10	-0.414404273	-8.95039E-10	-0.928826701	1.12101E-06	1163.325335	3.58639E-11	15.24333333	0.14045
9/14/17	Middle	Control	5.66925E-11	0.137150396	-1.17722E-09	-1.22165556	1.67144E-06	1734.536318	2.60674E-11	14.53666667	0.13975
10/12/17	Middle	Control	-6.003E-11	-0.145224456	-2.95324E-10	-0.306472758	7.15278E-07	742.2801728	1.22885E-10	8.33805556	0.23705
10/12/17	Middle	Control	-1.9005E-10	-0.459767998	-2.80765E-10	-0.29136375	7.23832E-07	751.1570669	1.10172E-10	6.757777778	0.23635
10/12/17	Middle	Control	1.63739E-10	0.396118486	-7.29907E-10	-0.757461776	1.05764E-06	1097.562953	5.69174E-11	8.338055556	0.23705
10/12/17	Middle	Control	-2.95064E-09	-7.138179396	-4.69772E-10	-0.487506568	1.11E-06	1154.845767	7.84998E-11	6.757777778	0.23635
6/13/18	Middle	Control	8.19862E-10	1.983410541	-1.01891E-09	-1.057371278	1.10063E-06	1142.184035	1.51352E-10	16.08	0.1056
6/13/18	Middle	Control	5.16172E-09	12.4872261	-7.07228E-10	-0.733926409	1.173E-06	1217.285014	9.92811E-11	21.0345	0.10705
6/13/18	Middle	Control	-3.55503E-10	-0.860031719	-7.08209E-10	-0.734943734	1.24446E-06	1291.440267	8.69993E-11	21.0345	0.10705
6/21/18	Middle	Control	4.47642E-11	0.108293657	-5.95939E-10	-0.618436202	1.72598E-06	1791.13964	8.94538E-11	21.5115	0.1401
6/21/18	Middle	Control	-1.48091E-10	-0.358262926	-6.15764E-10	-0.639009791	1.76895E-06	1835.733228	4.69367E-11	17.402	0.13935
6/21/18	Middle	Control	-3.05056E-10	-0.73799063	-8.64558E-10	-0.897195128	1.91299E-06	1985.210383	1.80994E-11	17.402	0.13935
7/25/18	Middle	Control	-7.06086E-11	-0.170816312	-1.12902E-09	-1.171640567	5.65412E-07	586.7565252	1.06195E-10	20.069	0.08745
7/25/18	Middle	Control	1.54479E-10	0.373716733	-1.74135E-09	-1.807090113	8.6802E-07	900.7883583	-2.71727E-11	21.154	0.08785
7/25/18	Middle	Control	-1.17235E-10	-0.283614309	-1.14031E-09	-1.183360504	1.36941E-06	1421.104416	8.23086E-11	21.154	0.08785
8/13/18	Middle	Control	-2.31134E-10	-0.559159618	-8.14169E-10	-0.844903992	4.76224E-07	494.201999	-1.93495E-11	25.699	0.0769
8/13/18	Middle	Control	-2.13895E-10	-0.517453713	-1.51986E-09	-1.577236746	5.87398E-07	609.5728727	1.31978E-12	25.699	0.0769
8/13/18	Middle	Control	-1.59529E-10	-0.385931541	-1.0556E-09	-1.095453296	6.7619E-07	701.7167674	6.94517E-12	25.699	0.0769
9/14/18	Middle	Control	-1.21829E-10	-0.29472866	-1.12535E-09	-1.167829476	1.08244E-06	1123.29973	4.89431E-12	19.369	0.1085
9/14/18	Middle	Control	-7.66851E-11	-0.18551658	-1.15898E-09	-1.202731645	1.09606E-06	1137.437237	2.63429E-12	21.228	0.10885
9/14/18	Middle	Control	-2.06586E-09	-4.997735996	-1.92478E-09	-1.997439439	1.6645E-06	1727.331963	6.52287E-12	19.369	0.1085
10/25/18	Middle	Control	6.65549E-11	0.161009572	-4.37944E-10	-0.454476561	6.14806E-07	638.0152183	-8.60516E-13	2.328055556	0.2291
10/25/18	Middle	Control	-2.20365E-08	-53.31058591	-3.63579E-10	-0.377303805	6.2046E-07	643.8828506	4.36064E-12	2.755	0.23085
10/25/18	Middle	Control	-4.09695E-11	-0.099113375	-5.8428E-10	-0.606336385	8.93109E-07	926.8246547	1.11339E-06	2.515	0.2298
7/28/19	Middle	Control	1.05305E-09	2.547550153	-1.17506E-09	-1.219423921	2.64837E-06	2748.349145	-1.05262E-11	19.86444444	11.615
7/28/19	Middle	Control	1.01681E-09	2.459865392	-1.53702E-09	-1.595043627	2.69637E-06	2798.15643	1.07796E-10	20.3525	11.685
7/28/19	Middle	Control	1.37692E-10	0.333104699	-1.48443E-09	-1.540463353	3.09594E-06	3212.811215	1.36807E-10	20.7225	11.76
9/5/19	Middle	Control	-1.51E-10	-0.3652992	-6.11E-10	-0.634065494	-0.000000196	-203.3990784	-8.42E-12	18.71138889	7.185
9/5/19	Middle	Control	4.66E-11	0.11273472	-8.09E-10	-0.839540074	0.000000449	465.9499296	8.97E-12	18.71138889	7.185
9/5/19	Middle	Control	1.4E-10	0.338688	-1.04E-09	-1.079260416	0.000000762	790.7658048	9.93E-11	13.01666667	7.185
9/20/19	Middle	Control	3.5313E-10	0.854291367	-8.33802E-10	-0.865278565	3.75547E-07	389.7238448	2.33431E-11	12.48194444	7.005
9/20/19	Middle	Control	-3.15413E-10	-0.763046013	-7.19347E-10	-0.746502319	3.81111E-07	395.4978068	4.20677E-11	13.48333333	7.04
9/20/19	Middle	Control	-2.24745E-10	-0.543702732	-7.73208E-10	-0.802397273	5.27199E-07	547.1011812	2.52738E-11	12.48194444	7.005
6/27/17	Middle	Lodgepole	-8.58059E-10	-2.075817216	-7.88798E-10	-0.818575361	2.47325E-06	2566.611596	6.54303E-11	23.4865	0.10635
6/27/17	Middle	Lodgepole	-1.16918E-09	-2.828468167	-1.13974E-09	-1.182768383	2.65433E-06	2754.530958	7.08906E-11	23.4865	0.10635
6/27/17	Middle	Lodgepole	1.87686E-10	0.454049266	-7.95484E-10	-0.825514266	2.78943E-06	2894.73251	5.10782E-11	24.123	0.1056
6/27/17	Middle	Lodgepole	-5.32165E-11	-0.128741286	-1.30585E-09	-1.355151048	4.62094E-06	4795.381248	4.16412E-11	23.4865	0.10635
8/3/17	Middle	Lodgepole	8.9665E-11	0.216917675	-8.17077E-10	-0.847922386	4.5359E-06	4707.136614	-3.07117E-11	11.236	0.18625
8/3/17	Middle	Lodgepole	-2.36213E-10	-0.571447053	-1.40632E-09	-1.459406844	5.03976E-06	5230.007783	-1.46671E-14	11.3095	0.18625
8/3/17	Middle	Lodgepole	8.22839E-11	0.199061303	-1.34144E-09	-1.392082824	6.60122E-06	6850.413973	7.17427E-12	11.236	0.18625
8/21/17	Middle	Lodgepole	-8.13E-11	-0.197	-5.48E-10	-0.569	0.00000112	1161.568285	1.75E-12	11.479	0.1158
8/21/17	Middle	Lodgepole	-1.85E-10	-0.448	-5.41E-10	-0.562	0.00000152	1577.796035	-2.45E-12	12.316	0.11435
8/21/17	Middle	Lodgepole	-5.03E-09	-12.2	-4.62E-10	-0.48	0.00000166	1727.384873	3.5E-11	11.479	0.1147
8/21/17	Middle	Lodgepole	4.02E-10	0.973	-6.29E-10	-0.652	0.00000177	1841.511759	-1.89E-12	11.8435	0.1147
8/21/17	Middle	Lodgepole	5.32E-10	1.29	-7.41E-10	-0.769	0.00000231	2395.790652	-6.46E-12	12.316	0.11435
9/14/17	Middle	Lodgepole	-6.30157E-10	-1.524476966	-5.28115E-10	-0.548051587	1.26071E-06	1308.29798	7.74136E-11	14.53666667	0.13975
9/14/17	Middle	Lodgepole	-3.85287E-12	-0.009320867	-5.4053E-10	-0.560935223	1.45432E-06	1509.224091	1.56231E-11	15.24333333	0.14045
9/14/17	Middle	Lodgepole	nan	nan	-9.71889E-10	-1.008578545	1.93941E-06	2012.62274	8.98675E-12	14.53666667	0.13975
10/12/17	Middle	Lodgepole	-1.77303E-09	-4.289316534	-2.4314E-10	-0.252318998	1.58648E-06	1646.368752	3.71811E-12	6.757777778	0.23635
10/12/17	Middle	Lodgepole	-1.36262E-10	-0.329645522	-2.27721E-10	-0.236317754	1.82971E-06	1898.780487	7.20006E-11	8.338055556	0.23705
10/12/17	Middle	Lodgepole	-2.97603E-11	-0.071996004	-1.66135E-10	-0.172406494	1.97256E-06	2047.020352	5.64368E-11	8.33805556	0.23705
10/12/17	Middle	Lodgepole	8.06275E-12	0.019505405	-4.19118E-10	-0.434939674	2.1376E-06	2218.293721	4.77198E-11	6.757777778	0.23635
6/13/18	Middle	Lodgepole	2.68648E-09	6.499140437	-7.53976E-10	-0.782439147	1.18171E-06	1226.32289	5.07771E-11	13.1835	0.10635
6/13/18	Middle	Lodgepole	-2.33961E-10	-0.56599946	-1.11718E-09	-1.159349424	1.29292E-06	1341.727777	7.89827E-11	16.08	0.1056
6/13/18	Middle	Lodgepole	5.79692E-11	0.140239032	-1.00777E-09	-1.04581615	1.89819E-06	1969.85154	9.00309E-11	18.7355	0.10635
6/21/18	Middle	Lodgepole	-1.18597E-10	-0.286911056	-8.58444E-10	-0.890850425	2.68936E-06	2790.887269	1.55693E-11	21.5115	0.1401
6/21/18	Middle	Lodgepole	9.9468E-10	2.406330263	-8.3808E-10	-0.869718304	2.77801E-06	2882.881852	2.12595E-11	17.402	0.13935
6/21/18	Middle	Lodgepole	-1.60476E-09	-3.882229931	-1.00435E-09	-1.042263002	4.42176E-06	4588.687043	4.85247E-11	19.7715	0.13975
7/25/18	Middle	Lodgepole	4.80661E-11	0.116281429	-1.21562E-09	-1.261513275	1.08241E-06	1123.275915	-9.05061E-11	22.0015	0.08855
7/25/18	Middle	Lodgepole	-4.15065E-12	-0.01004125	-1.57252E-09	-1.631878196	1.5383E-06	1596.371505	6.49294E-11	21.154	0.08785
7/25/18	Middle	Lodgepole	1.31125E-09	3.172171975	-1.25128E-09	-1.298511608	1.65538E-06	1717.869191	1.43245E-10	16.6885	0.0871
8/13/18	Middle	Lodgepole	-6.01819E-09	-14.55920788	-6.95174E-10	-0.721416926	4.92018E-07	510.5916518	-1.43157E-11	25.699	0.0769
8/13/18	Middle	Lodgepole	8.14542E-11	0.197054079	-1.10636E-09	-1.148125382	5.72832E-07	594.4570725	2.65037E-11	25.0415	0.07655
8/13/18	Middle	Lodgepole	3.95597E-10	0.957028253	-2.22655E-09	-2.31059925	1.67477E-06	1737.990455	1.21019E-11	25.0415	0.07655
9/14/18	Middle	Lodgepole	4.21042E-09	10.18584344	-1.38786E-09	-1.440252414	1.26776E-06	1315.617043	8.28575E-12	21.228	0.10885
9/14/18	Middle	Lodgepole	-1.30368E-10	-0.315385501	-9.94992E-10	-1.032553307	1.37862E-06	1430.661418	2.94083E-12	19.369	0.1085
9/14/18	Middle	Lodgepole	-2.15689E-09	-5.21795328	-1.52919E-09	-1.586921133	1.81817E-06	1886.807709	4.61834E-11	20.442	0.10885
10/25/18	Middle	Lodgepole	-2.15536E-11	-0.052142411	-6.67126E-10	-0.692310064	1.05545E-06	1095.291667	-8.07413E-12	2.328055556	0.2291
10/25/18	Middle	Lodgepole	nan	nan	-7.27472E-10	-0.754934467	1.37174E-06	1423.525151	5.981E-12	2.755	0.23085
10/25/18	Middle	Lodgepole	-2.34213E-10	-0.566607914	-5.56511E-10	-0.577519409	2.14191E-06	2222.765587	-9.91206E-13	2.515	0.2298
7/28/19	Middle	Lodgepole	1.88418E-09	4.55820286	-1.44041E-09	-1.494783089	3.36613E-06	3493.1982	-2.32636E-11	20.7225	11.76
7/28/19	Middle	Lodgepole	3.44292E-09	8.32912316	-2.57048E-09	-2.667521037	5.05661E-06	5247.498305	1.30441E-11	19.86444444	11.615
7/28/19	Middle	Lodgepole	2.67721E-10	0.647670106	-1.96646E-09	-2.04069377	6.56422E-06	6812.020079	2.21424E-10	20.7225	11.76
9/5/19	Middle	Lodgepole	-4.85E-09	-11.73312	-9.43E-10	-0.978598627	0.000000295	306.136368	5.23E-11	15.7225	7.185
9/5/19	Middle	Lodgepole	-1.59E-09	-3.846528	-7.85E-10	-0.814634064	0.000000483	501.2334432	6.93E-12	18.71138889	7.185
9/5/19	Middle	Lodgepole	1.07E-09	2.588544	-1.54E-09	-1.598135616	0.000000778	807.3698112	nan	13.01666667	7.185
9/20/19	Middle	Lodgepole	1.66978E-10	0.403953375	-4.48538E-10	-0.465470043	3.55165E-07	368.5724312	-6.61692E-11	12.48194444	7.005
9/20/19	Middle	Lodgepole	1.91924E-10	0.464303066	-7.45484E-10	-0.77362644	4.97226E-07	515.9969052	5.70792E-11	12.48194444	7.005
9/20/19	Middle	Lodgepole	-6.445E-12	-0.015591748	-9.83329E-10	-1.020450424	7.5876E-07	787.4030837	1.61349E-10	13.48333333	7.04
6/27/17	Middle	Spruce	-1.17E-08	-28.30452626	-9.55173E-10	-0.991230946	2.2076E-06	2290.934362	8.69481E-11	24.123	0.1056
6/27/17	Middle	Spruce	2.39128E-11	0.057849883	-1.1282E-09	-1.170793649	2.81268E-06	2918.859359	7.73335E-11	22.5885	0.10525
6/27/17	Middle	Spruce	-2.1141E-10	-0.511442938	-8.07442E-10	-0.837923598	2.89028E-06	2999.385959	9.64249E-11	22.5885	0.10525
6/27/17	Middle	Spruce	-1.34411E-10	-0.325166419	-9.09097E-10	-0.943415857	3.2424E-06	3364.805751	5.11423E-11	24.123	0.1056
8/3/17	Middle	Spruce	5.2435E-11	0.126850684	-1.04021E-09	-1.079481947	4.69591E-06	4873.185795	1.30731E-11	11.236	0.18625
8/3/17	Middle	Spruce	-4.0757E-10	-0.985992757	-1.0986E-09	-1.140068673	5.17983E-06	5375.371083	2.33101E-11	11.236	0.18625
8/3/17	Middle	Spruce	1.70386E-09	4.12196983	-1.03032E-09	-1.069210257	5.70687E-06	5922.30307	2.36307E-12	11.236	0.18625
8/21/17	Middle	Spruce	1.34E-11	0.0324	-5.5E-10	-0.571	0.00000071	737.1351094	1.24E-10	11.8435	0.1147
8/21/17	Middle	Spruce	1.99E-11	0.0482	-5.41E-10	-0.561	0.00000158	1642.107407	2.2E-12	11.479	0.1147
8/21/17	Middle	Spruce	-0.000000024	-57.9	-6.08E-10	-0.631	0.00000164	1705.594716	-5.55E-12	12.316	0.11435
8/21/17	Middle	Spruce	6.65E-10	1.61	-7.55E-10	-0.784	0.0000021	2180.659538	1.25E-11	11.479	0.1147
9/14/17	Middle	Spruce	-5.7137E-09	-13.82258164	-7.24109E-10	-0.751443906	1.18742E-06	1232.247866	7.60363E-11	14.53666667	0.13975
9/14/17	Middle	Spruce	-5.87288E-10	-1.420766766	-1.08378E-09	-1.124697831	1.19784E-06	1243.063228	9.89968E-12	15.24333333	0.14045
9/14/17	Middle	Spruce	-7.27489E-11	-0.175994184	-7.1891E-10	-0.746049441	1.27636E-06	1324.542324	-3.94843E-12	14.53666667	0.13975
10/12/17	Middle	Spruce	-3.05839E-10	-0.739885368	-1.8027E-10	-0.18707531	1.67542E-06	1738.663006	1.26729E-10	8.33805556	0.23705
10/12/17	Middle	Spruce	-1.11388E-10	-0.269469457	-3.41128E-10	-0.354005894	1.98416E-06	2059.065269	1.68539E-10	6.757777778	0.23635
10/12/17	Middle	Spruce	-1.70891E-09	-4.13419428	-4.35579E-10	-0.452021987	2.02369E-06	2100.089965	4.9637E-11	6.757777778	0.23635
10/12/17	Middle	Spruce	-5.48539E-11	-0.132702589	-3.69081E-10	-0.383014399	2.32445E-06	2412.194563	8.72495E-11	8.338055556	0.23705
6/13/18	Middle	Spruce	-6.84701E-11	-0.16564295	-9.94113E-10	-1.031640673	1.61878E-06	1679.885439	-2.86099E-12	21.0345	0.10705
6/13/18	Middle	Spruce	-9.00754E-11	-0.217910445	-6.0813E-10	-0.631087016	1.73613E-06	1801.666887	6.89884E-11	18.7355	0.10635
6/13/18	Middle	Spruce	9.59635E-11	0.232154933	-1.09546E-09	-1.136816947	2.03902E-06	2115.994479	5.30443E-11	13.1835	0.10635
6/21/18	Middle	Spruce	9.44424E-11	0.228475123	-1.09761E-09	-1.139041413	1.75331E-06	1819.493659	1.19675E-10	21.5115	0.1401
6/21/18	Middle	Spruce	3.08958E-10	0.747430586	-7.59108E-10	-0.787764881	2.05211E-06	2129.57996	1.15963E-11	17.402	0.13935
6/21/18	Middle	Spruce	-4.1481E-09	-10.03508521	-6.45202E-10	-0.669559072	2.49905E-06	2593.393579	-1.00608E-10	17.402	0.13935
7/25/18	Middle	Spruce	-2.15289E-10	-0.520827932	-1.08754E-09	-1.128596824	6.77582E-07	703.1609596	3.71606E-12	21.154	0.08785
7/25/18	Middle	Spruce	1.06225E-10	0.25697959	-1.36951E-09	-1.421211261	8.3053E-07	861.8827123	-9.74856E-12	21.154	0.08785
7/25/18	Middle	Spruce	-1.62338E-10	-0.392727008	-9.82302E-10	-1.019384142	1.54117E-06	1599.354778	6.30737E-11	22.0015	0.08855
8/13/18	Middle	Spruce	1.87946E-10	0.454679629	-1.11691E-09	-1.159078677	4.81217E-07	499.3829711	9.64257E-12	25.0415	0.07655
8/13/18	Middle	Spruce	-2.4351E-11	-0.058909957	-6.22157E-10	-0.645643647	6.40253E-07	664.4229764	-2.65413E-11	23.99	0.0769
8/13/18	Middle	Spruce	1.03854E-10	0.25124291	-1.21571E-09	-1.261603257	9.47412E-07	983.1776093	1.68859E-12	25.699	0.0769
9/14/18	Middle	Spruce	2.54488E-09	6.156564195	-1.14447E-09	-1.187675112	8.54619E-07	886.8811215	nan	20.442	0.10885
9/14/18	Middle	Spruce	9.18284E-12	0.022215116	-8.94184E-10	-0.927939928	1.16945E-06	1213.593461	3.37961E-11	20.442	0.10885
9/14/18	Middle	Spruce	-5.18239E-09	-12.53724646	-1.57352E-09	-1.632919434	1.73741E-06	1802.99452	nan	19.369	0.1085
10/25/18	Middle	Spruce	1.37259E-10	0.332057238	-4.86004E-10	-0.504351324	1.03086E-06	1069.774225	4.36076E-16	2.515	0.2298
10/25/18	Middle	Spruce	-1.07607E-08	-26.03227069	-8.01772E-10	-0.832039035	1.97498E-06	2049.535574	1.87004E-12	2.515	0.2298
10/25/18	Middle	Spruce	-4.66015E-12	-0.011273841	-6.0651E-10	-0.629406465	2.07566E-06	2154.020147	1.35602E-11	2.755	0.23085
7/28/19	Middle	Spruce	1.17867E-11	0.028514456	-1.71349E-09	-1.778177253	3.89438E-06	4041.397137	7.92211E-11	20.3525	11.685
7/28/19	Middle	Spruce	-3.85692E-10	-0.933066202	-1.63022E-09	-1.691763202	5.10534E-06	5298.067402	2.33375E-11	20.3525	11.685
7/28/19	Middle	Spruce	-1.63418E-10	-0.39534164	-1.2693E-09	-1.317213762	5.65995E-06	5873.615593	1.05331E-10	20.7225	11.76
9/5/19	Middle	Spruce	-1.24E-10	-0.2999808	-1.24E-09	-1.286810496	0.000000219	227.2673376	-9.78E-11	18.71138889	7.185
9/5/19	Middle	Spruce	-6.47E-11	-0.15652224	-1.29E-09	-1.338698016	0.000000312	323.7781248	1.08E-10	15.7225	7.185
9/5/19	Middle	Spruce	-3.19E-10	-0.7717248	-1.09E-09	-1.131147936	0.000000614	637.1787456	-1.81E-11	18.71138889	7.185
9/20/19	Middle	Spruce	3.82184E-10	0.924580224	-4.24118E-10	-0.440128417	3.74422E-07	388.5560681	1.43308E-11	12.48194444	7.005
9/20/19	Middle	Spruce	6.22835E-11	0.150676236	-1.05069E-09	-1.090356399	3.81746E-07	396.15708	8.95832E-12	12.48194444	7.005
9/20/19	Middle	Spruce	2.83548E-10	0.685958432	-8.62573E-10	-0.895135562	7.06073E-07	732.7280205	8.42667E-11	13.48333333	7.04
6/27/17	Middle-ES	Control	-1.84156E-09	-4.455104176	-1.27777E-09	-1.3260018	2.15922E-06	2240.728002	-2.72843E-12	24.123	0.1056
6/27/17	Middle-ES	Control	-1.18251E-11	-0.028607342	-9.55195E-10	-0.99125426	2.80152E-06	2907.277754	5.56773E-11	24.123	0.1056
6/27/17	Middle-ES	Control	3.09407E-11	0.074851698	-1.26406E-09	-1.311776761	3.2471E-06	3369.682541	-8.44517E-13	24.122	0.1063
6/27/17	Middle-ES	Control	-1.02497E-08	-24.79616609	-1.61282E-09	-1.673705306	3.56528E-06	3699.865596	7.38685E-12	23.509	0.10745
8/3/17	Middle-ES	Control	-3.42053E-08	-82.74944821	-1.20871E-09	-1.254338385	3.40283E-06	3531.28924	2.202E-11	11.3095	0.18625
8/3/17	Middle-ES	Control	-7.71645E-11	-0.186676349	-8.68963E-10	-0.901766443	4.68822E-06	4865.199534	-8.47775E-11	11.382	0.18585
8/3/17	Middle-ES	Control	2.11601E-10	0.511905417	-1.05448E-09	-1.094290064	5.12448E-06	5317.930567	-5.0249E-11	11.382	0.18585
8/21/17	Middle-ES	Control	6.35E-10	1.54	-9.52E-10	-0.988	0.00000112	1163.044453	1.61E-11	11.856	0.1147
8/21/17	Middle-ES	Control	-8.65E-11	-0.209	-9.33E-10	-0.968	0.00000156	1622.727254	8.83E-11	14.0465	0.1154
8/21/17	Middle-ES	Control	-3.39E-11	-0.082	-9.97E-10	-1.03	0.00000157	1625.754757	5.62E-11	14.0465	0.1154
8/21/17	Middle-ES	Control	8.5E-10	2.06	-5.74E-10	-0.596	0.00000163	1691.638415	1.23E-11	14.0465	0.1154
9/14/17	Middle-ES	Control	2.05272E-10	0.496592866	-9.70185E-10	-1.006809363	9.60623E-07	996.8872519	-3.98243E-12	15.925	0.13975
9/14/17	Middle-ES	Control	9.47158E-10	2.291365795	-7.96346E-10	-0.826408809	1.69509E-06	1759.082009	3.52396E-12	15.925	0.13975
9/14/17	Middle-ES	Control	-9.06715E-10	-2.193525238	-9.79904E-10	-1.016895456	2.40983E-06	2500.799845	2.26452E-11	15.30583333	0.13975
10/12/17	Middle-ES	Control	1.82585E-10	0.441708883	-3.27906E-10	-0.340284666	4.32275E-07	448.5931788	3.75676E-11	5.078333333	0.236
10/12/17	Middle-ES	Control	-9.75157E-11	-0.235909956	-4.99814E-10	-0.518681942	5.9661E-07	619.1319943	6.13328E-12	1.951944444	0.2356
10/12/17	Middle-ES	Control	9.68274E-11	0.234244877	-2.82999E-10	-0.293682611	6.12491E-07	635.6128532	-9.36249E-12	3.2725	0.23525
10/12/17	Middle-ES	Control	7.99471E-11	0.193407973	-6.17747E-10	-0.641067278	8.08366E-07	838.8819692	-1.83716E-12	2.073888889	0.2349
6/13/18	Middle-ES	Control	4.13013E-10	0.999161932	-1.28435E-09	-1.332833458	1.33082E-06	1381.055032	3.57357E-11	16.08	0.1056
6/13/18	Middle-ES	Control	-4.09654E-09	-9.910348218	-7.72016E-10	-0.801159772	1.73645E-06	1801.999757	1.63986E-11	21.0345	0.10705
6/13/18	Middle-ES	Control	5.68871E-11	0.137621265	-1.12837E-09	-1.170968827	2.01499E-06	2091.05175	2.00718E-11	16.08	0.1056
6/21/18	Middle-ES	Control	4.35646E-11	0.105391408	-1.06853E-09	-1.10886285	2.81766E-06	2924.027813	9.20362E-11	17.402	0.13935
6/21/18	Middle-ES	Control	-4.40889E-11	-0.106659782	-6.63218E-10	-0.688254593	3.44112E-06	3571.019871	2.91431E-11	21.5115	0.1401
6/21/18	Middle-ES	Control	1.92378E-10	0.465400684	-1.21327E-09	-1.259072274	3.99364E-06	4144.404536	2.31019E-11	21.5115	0.1401
7/25/18	Middle-ES	Control	-2.57304E-11	-0.062246904	-1.22346E-09	-1.269645081	1.25056E-06	1297.774268	1.10614E-10	21.154	0.08785
7/25/18	Middle-ES	Control	5.98333E-10	1.44748778	-1.34805E-09	-1.398935544	1.74161E-06	1807.353485	-7.95178E-12	20.069	0.08745
7/25/18	Middle-ES	Control	4.87611E-09	11.79629707	-2.14344E-09	-2.22435969	2.06789E-06	2145.952269	1.40465E-10	16.6885	0.0871
8/13/18	Middle-ES	Control	-2.27008E-09	-5.491771997	-6.81604E-10	-0.707334603	7.06395E-07	733.0619859	1.14748E-11	25.699	0.0769
8/13/18	Middle-ES	Control	1.22313E-10	0.295898522	-9.05059E-10	-0.939225279	7.27877E-07	755.3542788	1.62657E-10	25.0415	0.07655
8/13/18	Middle-ES	Control	-1.47652E-11	-0.035720055	-2.67163E-09	-2.772482679	2.55671E-06	2653.230403	2.90492E-12	25.699	0.0769
9/14/18	Middle-ES	Control	3.00155E-09	7.261341264	-7.30704E-10	-0.758288751	9.28756E-07	963.8170943	8.85132E-12	21.228	0.10885
9/14/18	Middle-ES	Control	3.58943E-11	0.086835568	-1.4552E-09	-1.510137513	1.55103E-06	1609.586	2.40554E-11	19.369	0.1085
9/14/18	Middle-ES	Control	1.22433E-07	296.1905426	-1.1401E-09	-1.183142901	1.71044E-06	1775.010249	4.15881E-12	21.228	0.10885
10/25/18	Middle-ES	Control	-7.31647E-11	-0.177000159	-5.62873E-10	-0.584121756	8.84912E-07	918.3175995	3.01419E-12	2.755	0.23085
10/25/18	Middle-ES	Control	1.30254E-10	0.31511092	-6.85897E-10	-0.711789697	1.57847E-06	1638.059048	-3.60844E-12	2.328055556	0.2291
10/25/18	Middle-ES	Control	1.97376E-10	0.477491956	-7.88171E-10	-0.817924693	1.63279E-06	1694.43193	1.45192E-12	2.328055556	0.2291
7/28/19	Middle-ES	Control	3.7156E-10	0.898877316	-1.46743E-09	-1.522828327	3.34033E-06	3466.426335	4.10049E-11	19.86444444	11.615
7/28/19	Middle-ES	Control	-1.65024E-10	-0.39922494	-1.78824E-09	-1.855741663	4.72727E-06	4905.72404	2.43493E-10	20.7225	11.76
7/28/19	Middle-ES	Control	6.5031E-11	0.157322978	-2.83867E-09	-2.945828648	7.78624E-06	8080.176954	2.80379E-12	19.86444444	11.615
9/5/19	Middle-ES	Control	-2.86E-11	-0.06918912	-3.37E-10	-0.349721885	0.000000289	299.9098656	2.27E-11	13.01666667	7.185
9/5/19	Middle-ES	Control	-0.000000025	-60.48	-1.06E-09	-1.100015424	0.000000832	863.4083328	4.8E-11	13.01666667	7.185
9/5/19	Middle-ES	Control	-2.21E-10	-0.5346432	2.38E-10	0.246984595	0.000000932	967.1833728	-9.07E-11	18.71138889	7.185
9/20/19	Middle-ES	Control	-2.17493E-10	-0.52615834	-3.37548E-10	-0.350290395	3.7396E-07	388.0767422	7.63734E-11	13.48333333	7.04
9/20/19	Middle-ES	Control	1.58892E-09	3.843905058	-7.45048E-10	-0.773173465	6.37962E-07	662.0448979	2.3601E-11	13.48333333	7.04
9/20/19	Middle-ES	Control	3.334E-09	8.065606515	-8.65099E-10	-0.897756426	7.77205E-07	806.5442908	4.85588E-11	12.48194444	7.005
6/27/17	Middle-ES	Lodgepole	1.36755E-10	0.330837877	-9.11273E-10	-0.945674229	2.54296E-06	2638.953092	3.08388E-11	24.122	0.1063
6/27/17	Middle-ES	Lodgepole	-2.18125E-11	-0.052768835	-1.16057E-09	-1.20437997	2.86461E-06	2972.754602	8.3828E-12	23.509	0.10745
6/27/17	Middle-ES	Lodgepole	8.01996E-12	0.019401895	-1.09069E-09	-1.13186827	2.94537E-06	3056.559122	3.45507E-11	24.123	0.1056
6/27/17	Middle-ES	Lodgepole	-2.43837E-11	-0.058989042	-1.17543E-09	-1.219803952	3.59411E-06	3729.785531	9.46105E-12	24.122	0.1063
8/3/17	Middle-ES	Lodgepole	-3.38252E-11	-0.081829902	-1.00328E-09	-1.04115507	5.24381E-06	5441.76352	1.61592E-11	11.3095	0.18625
8/3/17	Middle-ES	Lodgepole	-2.07283E-10	-0.501459387	-7.47847E-10	-0.776078525	6.63848E-06	6889.086315	4.54886E-11	11.382	0.18585
8/3/17	Middle-ES	Lodgepole	-5.60875E-11	-0.13568695	-7.91232E-10	-0.821101651	7.91995E-06	8218.926502	-1.4491E-11	11.382	0.18585
8/21/17	Middle-ES	Lodgepole	5.15E-11	0.125	-6.68E-10	-0.693	0.00000175	1819.925181	-1.85E-12	11.856	0.1158
8/21/17	Middle-ES	Lodgepole	-1.21E-09	-2.92	-4.6E-10	-0.477	0.00000176	1821.625699	1.1E-10	14.0465	0.1154
8/21/17	Middle-ES	Lodgepole	3.8E-11	0.0918	-3.96E-10	-0.411	0.00000218	2266.023524	8.23E-11	14.0465	0.1154
8/21/17	Middle-ES	Lodgepole	-7.27E-10	-1.76	-5.27E-10	-0.547	0.00000222	2302.985039	1.06E-10	11.856	0.1158
9/14/17	Middle-ES	Lodgepole	4.88679E-10	1.182212055	-8.83877E-10	-0.91724402	1.62946E-06	1690.969796	-5.19561E-12	15.24333333	0.14045
9/14/17	Middle-ES	Lodgepole	-2.18113E-11	-0.052765859	-5.92762E-10	-0.61513894	2.48049E-06	2574.12599	2.53318E-11	15.925	0.13975
9/14/17	Middle-ES	Lodgepole	-3.11271E-11	-0.075302715	-4.84271E-10	-0.502552098	3.98716E-06	4137.681307	1.62739E-11	15.925	0.13975
10/12/17	Middle-ES	Lodgepole	-1.51269E-10	-0.36594912	-2.1061E-10	-0.218560748	7.95236E-07	825.2561282	-7.51895E-13	1.951944444	0.2356
10/12/17	Middle-ES	Lodgepole	-3.05116E-10	-0.738136233	-3.11854E-10	-0.32362663	1.26925E-06	1317.163991	1.7231E-11	2.073888889	0.2349
10/12/17	Middle-ES	Lodgepole	2.17529E-11	0.052624638	-1.71953E-10	-0.178443811	1.39462E-06	1447.264441	-4.27335E-12	3.2725	0.23525
10/12/17	Middle-ES	Lodgepole	-5.5327E-10	-1.338471656	-9.51096E-10	-0.987000405	2.44321E-06	2535.437514	1.96939E-12	3.2725	0.23525
6/13/18	Middle-ES	Lodgepole	-4.99778E-09	-12.09063049	-6.60004E-10	-0.684919111	1.33776E-06	1388.263215	1.39181E-10	16.08	0.1056
6/13/18	Middle-ES	Lodgepole	-1.62965E-09	-3.942458214	-7.40507E-10	-0.768461143	1.70075E-06	1764.949093	7.3641E-11	18.7355	0.10635
6/13/18	Middle-ES	Lodgepole	6.12278E-11	0.148122208	-7.58962E-10	-0.787612835	1.73413E-06	1799.589894	9.0308E-11	16.08	0.1056
6/21/18	Middle-ES	Lodgepole	2.50168E-09	6.052057015	-4.45422E-10	-0.46223727	3.00494E-06	3118.379208	3.50108E-07	19.7715	0.13975
6/21/18	Middle-ES	Lodgepole	1.34699E-10	0.325863282	-4.2821E-10	-0.444375489	3.13933E-06	3257.844566	-8.32673E-12	19.7715	0.13975
6/21/18	Middle-ES	Lodgepole	-3.24655E-09	-7.854064598	-6.05471E-10	-0.628328118	3.78341E-06	3926.23963	2.68993E-11	17.402	0.13935
7/25/18	Middle-ES	Lodgepole	-2.54633E-08	-61.60075213	-9.83228E-10	-1.02034519	9.23067E-07	957.9126904	-8.70494E-11	20.069	0.08745
7/25/18	Middle-ES	Lodgepole	-4.36333E-09	-10.55575776	-1.16919E-09	-1.213324273	1.28746E-06	1336.062139	-1.42635E-11	20.069	0.08745
7/25/18	Middle-ES	Lodgepole	-2.98489E-11	-0.072210534	-1.1806E-09	-1.225168468	1.58322E-06	1642.991888	2.49079E-11	20.069	0.08745
8/13/18	Middle-ES	Lodgepole	9.72021E-11	0.235151212	-5.85234E-10	-0.607326823	-1.3553E-06	-1406.459216	5.99579E-07	25.699	0.0769
8/13/18	Middle-ES	Lodgepole	-8.32122E-11	-0.201306891	-5.12102E-10	-0.53143385	3.32889E-07	345.4552284	3.49988E-11	23.99	0.0769
8/13/18	Middle-ES	Lodgepole	-2.94472E-12	-0.007123867	-6.61566E-10	-0.686540224	7.31924E-07	759.5543374	4.30844E-11	25.699	0.0769
8/13/18	Middle-ES	Lodgepole	-8.55554E-11	-0.206975652	-1.32268E-09	-1.372607463	1.00321E-06	1041.084212	-2.8962E-12	23.99	0.0769
9/14/18	Middle-ES	Lodgepole	1.70515E-11	0.041251	-8.84957E-10	-0.91836407	1.20487E-06	1250.356287	-3.99576E-12	19.369	0.1085
9/14/18	Middle-ES	Lodgepole	-1.7101E-10	-0.413707342	-8.47668E-10	-0.879667975	1.24788E-06	1294.989927	6.97236E-12	20.442	0.10885
9/14/18	Middle-ES	Lodgepole	-3.73363E-11	-0.090323997	-7.5683E-10	-0.78540056	1.61427E-06	1675.20788	4.00837E-12	20.442	0.10885
10/25/18	Middle-ES	Lodgepole	1.91003E-07	462.0735948	-1.66787E-10	-0.17308305	8.59257E-07	891.6943137	7.17975E-12	2.515	0.2298
10/25/18	Middle-ES	Lodgepole	-9.80655E-10	-2.372401123	-2.81336E-10	-0.291956947	1.50015E-06	1556.779805	-2.32391E-11	2.515	0.2298
10/25/18	Middle-ES	Lodgepole	-5.39193E-09	-13.04416908	-2.96971E-10	-0.308181269	1.85221E-06	1922.130502	1.21229E-10	2.755	0.23085
7/28/19	Middle-ES	Lodgepole	8.79707E-10	2.128186547	-1.03397E-09	-1.073004246	3.84713E-06	3992.362963	5.92616E-11	20.3525	11.685
7/28/19	Middle-ES	Lodgepole	1.19047E-09	2.879978803	-9.92843E-10	-1.03032354	4.08077E-06	4234.818806	1.48792E-11	20.7225	11.76
7/28/19	Middle-ES	Lodgepole	1.35963E-10	0.328920961	-3.13916E-09	-3.257669475	1.21711E-05	12630.57768	-3.06765E-13	19.86444444	11.615
9/5/19	Middle-ES	Lodgepole	-2.89E-09	-6.991488	-5.73E-10	-0.594630979	0.000000525	544.81896	1.69E-11	18.71138889	7.185
9/5/19	Middle-ES	Lodgepole	-1.23E-12	-0.002975616	-6.72E-10	-0.697368269	0.00000063	653.782752	-2.69E-12	18.71138889	7.185
9/5/19	Middle-ES	Lodgepole	3E-10	0.72576	-9.03E-10	-0.937088611	0.00000151	1567.003104	1.03E-10	15.7225	7.185
9/20/19	Middle-ES	Lodgepole	-1.58378E-09	-3.831478752	-5.79003E-10	-0.600860358	5.45221E-07	565.8031907	1.06103E-11	12.48194444	7.005
9/20/19	Middle-ES	Lodgepole	-1.02641E-09	-2.483084309	-1.45239E-09	-1.507216745	7.48111E-07	776.3523373	3.90911E-11	12.48194444	7.005
9/20/19	Middle-ES	Lodgepole	1.25375E-10	0.303306767	-4.78262E-10	-0.496316203	9.03745E-07	937.8613335	5.75246E-11	13.48333333	7.04
6/27/17	Middle-ES	Spruce	-3.26103E-10	-0.7889075	-1.20953E-09	-1.255187268	2.16183E-06	2243.438934	-1.09424E-11	24.122	0.1063
6/27/17	Middle-ES	Spruce	1.06824E-12	0.002584285	-1.14835E-09	-1.191696278	2.45339E-06	2546.005823	5.24943E-11	23.509	0.10745
6/27/17	Middle-ES	Spruce	1.60388E-11	0.038801027	-9.95522E-10	-1.033103679	2.51929E-06	2614.392632	6.2003E-11	23.509	0.10745
6/27/17	Middle-ES	Spruce	-3.54341E-11	-0.085722292	-1.10441E-09	-1.146106158	2.96299E-06	3074.847203	-5.06224E-13	24.122	0.1063
8/3/17	Middle-ES	Spruce	9.81086E-11	0.237344277	-8.79385E-10	-0.912581687	4.66276E-06	4838.778692	2.45155E-11	11.3095	0.18625
8/3/17	Middle-ES	Spruce	1.88128E-11	0.045511857	-1.18528E-09	-1.230029231	5.46946E-06	5675.929173	8.72519E-12	11.3095	0.18625
8/3/17	Middle-ES	Spruce	-1.15409E-10	-0.279197763	-7.86085E-10	-0.815760505	6.84288E-06	7101.205205	1.04233E-10	11.382	0.18585
8/21/17	Middle-ES	Spruce	1.59E-10	0.384	-5.73E-10	-0.595	0.00000129	1343.379424	1.31E-11	11.856	0.1158
8/21/17	Middle-ES	Spruce	6.01E-10	1.45E+00	-6.84E-10	-7.10E-01	1.43E-06	1484.673674	7.88E-11	14.0465	0.1154
8/21/17	Middle-ES	Spruce	3.73E-10	9.02E-01	-5.44E-10	-5.64E-01	1.53E-06	1586.751293	6.37E-11	14.0465	0.1154
8/21/17	Middle-ES	Spruce	-2.71E-09	-6.56E+00	-5.72E-10	-5.93E-01	1.74E-06	1810	1.04E-10	11.856	0.1158
9/14/17	Middle-ES	Spruce	-3.03497E-10	-0.734220724	-7.15176E-10	-0.742173709	2.22785E-06	2311.947992	6.26279E-12	15.925	0.13975
9/14/17	Middle-ES	Spruce	1.08976E-11	0.026363417	-6.22559E-10	-0.646061358	2.34292E-06	2431.367163	1.14213E-10	15.925	0.13975
9/14/17	Middle-ES	Spruce	-2.02812E-09	-4.906438175	-7.84789E-10	-0.814414721	2.67503E-06	2776.015613	-2.79627E-11	15.30583333	0.13975
10/12/17	Middle-ES	Spruce	-4.80307E-09	-11.6195939	-2.39654E-10	-0.248701446	5.69136E-07	590.6211149	-3.921E-12	1.951944444	0.2356
10/12/17	Middle-ES	Spruce	-6.68935E-11	-0.161828695	-2.86098E-10	-0.296898751	8.40572E-07	872.303943	-2.14508E-12	2.073888889	0.2349
10/12/17	Middle-ES	Spruce	-2.11994E-09	-5.128560762	-1.62001E-10	-0.168116646	8.69556E-07	902.3821979	3.19574E-12	2.073888889	0.2349
10/12/17	Middle-ES	Spruce	2.76056E-11	0.066783494	-1.90201E-10	-0.19738089	1.2828E-06	1331.222167	-1.6366E-12	3.2725	0.23525
6/13/18	Middle-ES	Spruce	-2.64032E-10	-0.638745197	-4.28329E-10	-0.444498589	7.73311E-07	802.5038077	-3.76654E-10	18.7355	0.10635
6/13/18	Middle-ES	Spruce	-2.63074E-11	-0.06364295	-9.54911E-10	-0.990959556	1.32928E-06	1379.464187	-1.40851E-11	21.0345	0.10705
6/13/18	Middle-ES	Spruce	6.519E-09	15.77077627	-6.81649E-10	-0.70738196	1.4968E-06	1553.302783	9.71331E-11	18.7355	0.10635
6/21/18	Middle-ES	Spruce	9.58019E-12	0.023176402	-6.51195E-10	-0.675778206	2.08685E-06	2165.631815	6.99868E-11	21.5115	0.1401
6/21/18	Middle-ES	Spruce	-1.53372E-08	-37.10383045	-5.77766E-10	-0.599576388	2.38031E-06	2470.166221	1.94803E-11	19.7715	0.13975
6/21/18	Middle-ES	Spruce	-1.75392E-10	-0.424307833	-5.11548E-10	-0.530859451	2.4929E-06	2587.005758	1.6663E-09	19.7715	0.13975
7/25/18	Middle-ES	Spruce	-1.81428E-10	-0.438910695	-7.74643E-10	-0.803886129	7.38991E-07	766.8882012	5.70012E-11	22.0015	0.08855
7/25/18	Middle-ES	Spruce	-2.45975E-08	-59.5062112	-1.16919E-09	-1.213323418	8.07358E-07	837.8365066	-5.1643E-13	21.154	0.08785
7/25/18	Middle-ES	Spruce	3.06214E-11	0.074079223	-9.64387E-10	-1.000792731	8.56428E-07	888.7585409	-1.08087E-11	21.154	0.08785
8/13/18	Middle-ES	Spruce	6.76473E-08	163.652349	-6.78869E-10	-0.704497063	3.50105E-07	363.3215642	1.52019E-12	23.99	0.0769
8/13/18	Middle-ES	Spruce	-4.70744E-11	-0.11388246	-8.45672E-10	-0.877596202	5.85601E-07	607.7073242	1.36397E-10	25.699	0.0769
8/13/18	Middle-ES	Spruce	1.22041E-10	0.29524142	-1.00261E-09	-1.040457926	6.52616E-07	677.2521326	-5.96046E-14	25.0415	0.07655
9/14/18	Middle-ES	Spruce	-3.30698E-10	-0.80002379	-8.22388E-10	-0.85343333	8.33083E-07	864.5318181	1.88988E-11	21.228	0.10885
9/14/18	Middle-ES	Spruce	-1.04167E-10	-0.252001544	-7.14868E-10	-0.741854036	1.03108E-06	1070.005929	1.47859E-11	20.442	0.10885
9/14/18	Middle-ES	Spruce	-2.38863E-10	-0.577858549	-6.62632E-10	-0.687647053	1.05625E-06	1096.125758	1.31842E-11	20.442	0.10885
10/25/18	Middle-ES	Spruce	-1.55878E-09	-3.77101243	-2.15099E-10	-0.223219334	9.13356E-07	947.8358588	-1.89094E-12	2.515	0.2298
10/25/18	Middle-ES	Spruce	-2.59132E-10	-0.62689143	-3.78425E-10	-0.39271073	9.45823E-07	981.5280695	-8.77197E-12	2.328055556	0.2291
10/25/18	Middle-ES	Spruce	2.15808E-09	5.220838117	-3.14403E-10	-0.326272347	1.18902E-06	1233.91073	6.00083E-12	2.515	0.2298
7/28/19	Middle-ES	Spruce	1.40202E-10	0.339177759	-1.15261E-09	-1.196121125	3.70047E-06	3840.160634	1.48783E-10	20.7225	11.76
7/28/19	Middle-ES	Spruce	-1.48652E-09	-3.59618074	-1.55024E-09	-1.608757182	4.25976E-06	4420.566371	-5.84797E-07	19.86444444	11.615
7/28/19	Middle-ES	Spruce	-7.50972E-11	-0.181675117	-4.59739E-09	-4.770941461	1.50317E-05	15599.10156	5.93437E-11	20.3525	11.685
9/5/19	Middle-ES	Spruce	0.000000036	87.0912	-8.66E-10	-0.898691846	0.000000562	583.2157248	8.01E-11	15.7225	7.185
9/5/19	Middle-ES	Spruce	-2.38E-10	-0.5757696	-6.6E-10	-0.684915264	0.000000641	665.1980064	2.36E-11	15.7225	7.185
9/5/19	Middle-ES	Spruce	-1.77E-09	-4.281984	-4.21E-10	-0.436892918	0.000000903	937.0886112	-0.00000701	18.71138889	7.185
9/20/19	Middle-ES	Spruce	4.39446E-11	0.106310741	-5.38015E-10	-0.558325746	4.9637E-07	515.1078739	2.14842E-11	13.48333333	7.04
9/20/19	Middle-ES	Spruce	-9.08949E-10	-2.198929115	-5.28154E-10	-0.548092461	5.05227E-07	524.2992889	2.35039E-11	12.48194444	7.005
9/20/19	Middle-ES	Spruce	-1.32634E-09	-3.208685962	-4.06032E-10	-0.421359845	5.41622E-07	562.0689082	5.7791E-11	12.48194444	7.005
