# Supplementary material for: Effect of elevation, season and accelerated snowmelt on biogeochemical processes during isolated conifer needle litter decomposition
Source: PeerJ. 2021 Aug 10;9:e11926. doi: 10.7717/peerj.11926 (PMC8362670; doi:10.7717/peerj.11926)
Supplement: Supplemental Information 22 [file peerj-09-11926-s022.csv]

Location	Sample	OCT2020 Weight (g)	AUG2017 Weight (g)	Change %
Lower	Spruce1	1.6	2	18%
Lower	Spruce2	1.7	2	16%
Lower	Spruce3	1.7	2	17%
Lower	Lodgepole1	1.6	2	22%
Lower	Lodgepole2	1.6	2	19%
Middle	Spruce1	1.8	2	8%
Middle	Spruce2	1.7	2	16%
Middle	Spruce3	1.7	2	15%
Middle	Lodgepole1	1.4	2	28%
Middle	Lodgepole2	1.7	2	15%
Middle	Lodgepole3	1.5	2	23%
Middle	Lodgepole4	1.6	2	18%
Middle-ES	Spruce1	1.7	2	14%
Middle-ES	Spruce2	1.6	2	22%
Middle-ES	Spruce3	1.7	2	16%
Middle-ES	Spruce4	1.7	2	18%
Middle-ES	Lodgepole1	1.6	2	22%
Middle-ES	Lodgepole2	1.5	2	24%
Middle-ES	Lodgepole3	1.6	2	21%
